# Supplementary material for: Directional scrolling of SiGe/Si/Cr nanoribbon on Si(111) surfaces controlled by two-fold rotational symmetry underetching
Source: Royal Society of Chemistry journal article supplement (doi:10.1039/c2nr32515b), 2012-11-26
Supplement: c2nr32515b.pdf [file c2nr32515b.pdf]

Electronic Supplementary Information (ESI)

## **Directional scrolling of SiGe/Si/Cr nanoribbon on Si (111) surfaces controlled by two-fold rotational symmetry underetching**

*Lu Dai<sup>1,\*</sup> and Li Zhang<sup>2,\*</sup>*

<sup>1</sup>School of Mathematics and Physics, Suzhou University of Science and Technology,

Suzhou 215011, China

<sup>2</sup>Department of Mechanical and Automation Engineering, The Chinese University of Hong Kong, Hong Kong

SAR, China

---

\* To whom correspondence should be addressed. E-mail: [dailu.2008@yahoo.com.cn](mailto:dailu.2008@yahoo.com.cn) (L. Dai) & [lizhang@mae.cuhk.edu.hk](mailto:lizhang@mae.cuhk.edu.hk) (L. Zhang)

Supplementary-Figure 1

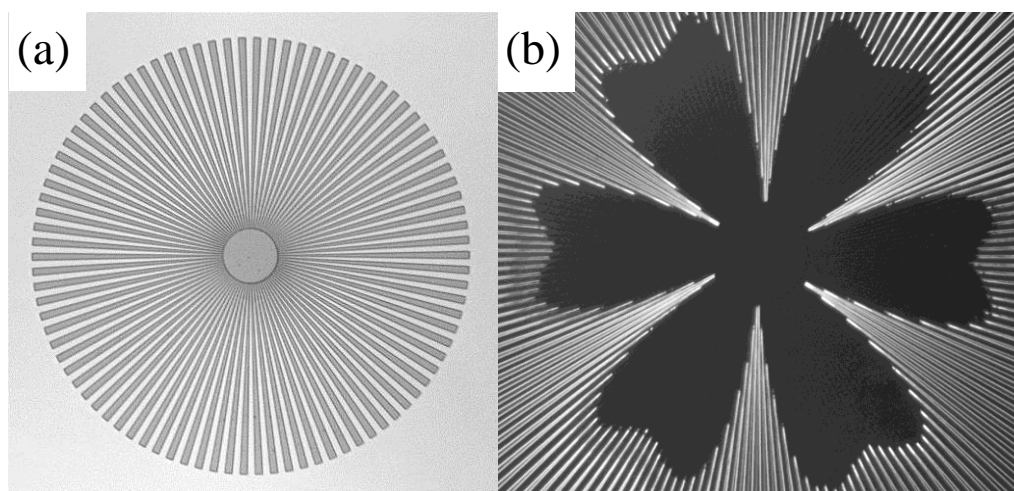

Supplementary-Figure 1. (a) Wagon wheel pattern (b) SEM image of lateral underetching profile on Si (111).

S-Fig.1(a) show that a wagon wheel shaped pattern [1] were designed for Si (111) substrate to investigate the dependence of lateral underetching rate on the crystallographic orientation of mesa lines. As presented in S-Fig.1(b) after etching the Si (111) substrate with a wagon wheel pattern, a snowflake-like figure developed. The underetching profile shows a 6-fold symmetry with twelve fastest etching directions.

Supplementary-Figure 2

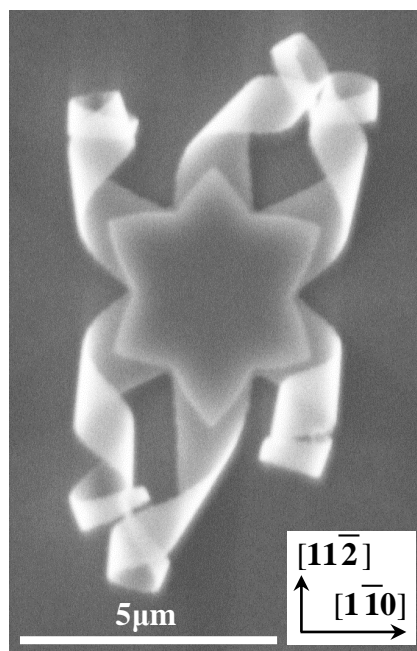

Supplementary-Figure 2. SEM top view images of  $\text{Si}_{0.6}\text{Ge}_{0.4}/\text{Si}/\text{Cr}$  helices with layer thickness of 8/10/15nm. The  $[1\bar{1}0]$  and  $[11\bar{2}]$  orientation on the substrate is shown by black arrows. Six tapered stripes are aligned in the  $\langle 112 \rangle$  and form roll-shape helices. The four right hand helices and two left hand ones show a 2-fold rotational symmetry.

## REFERENCES

1. H. Seidel, L. Csepregi, A. Heuberger, and H. Baumgartel, *Journal of the Electrochemical Society* 1990, **137**, 3612.
